# Supplementary material for: Deficiency of Stabilin-1 in the Context of Hepatic Melanoma Metastasis
Source: MDPI journal article supplement (doi:10.3390/cancers16020441), 2024-01-19
Supplement: s1 [file s1]

## Supplementary Tables

**Table S1.** List of primers for genotyping.

| Primer            | Sequence                 |
|-------------------|--------------------------|
| mStab1_pcr_A1F    | AGACTATGGTCTCAGTCTGGGA   |
| mStab1_pcr_B461R  | CTGCAATCACTGTCCCCACACT   |
| mStab1_pcr_C1224R | TTATTTCATACCCGCCAGTTCTGA |
