# Supplementary material for: Deficiency of Stabilin-1 in the Context of Hepatic Melanoma Metastasis
Source: MDPI journal article supplement (doi:10.3390/cancers16020441), 2024-01-19

Figure S1

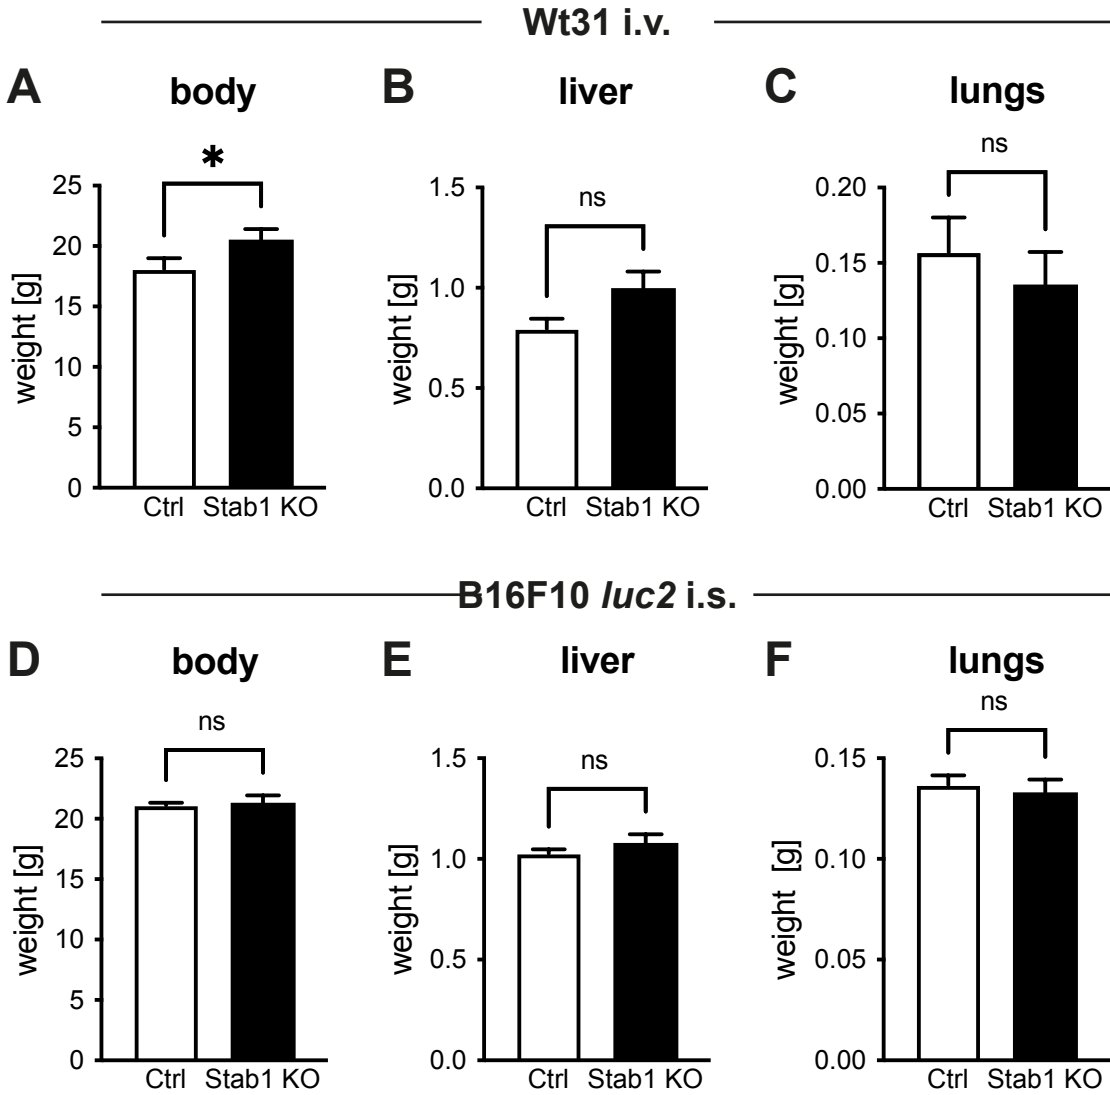

**Figure S2**

**Livers of mice injected with Wt31 i.v.**

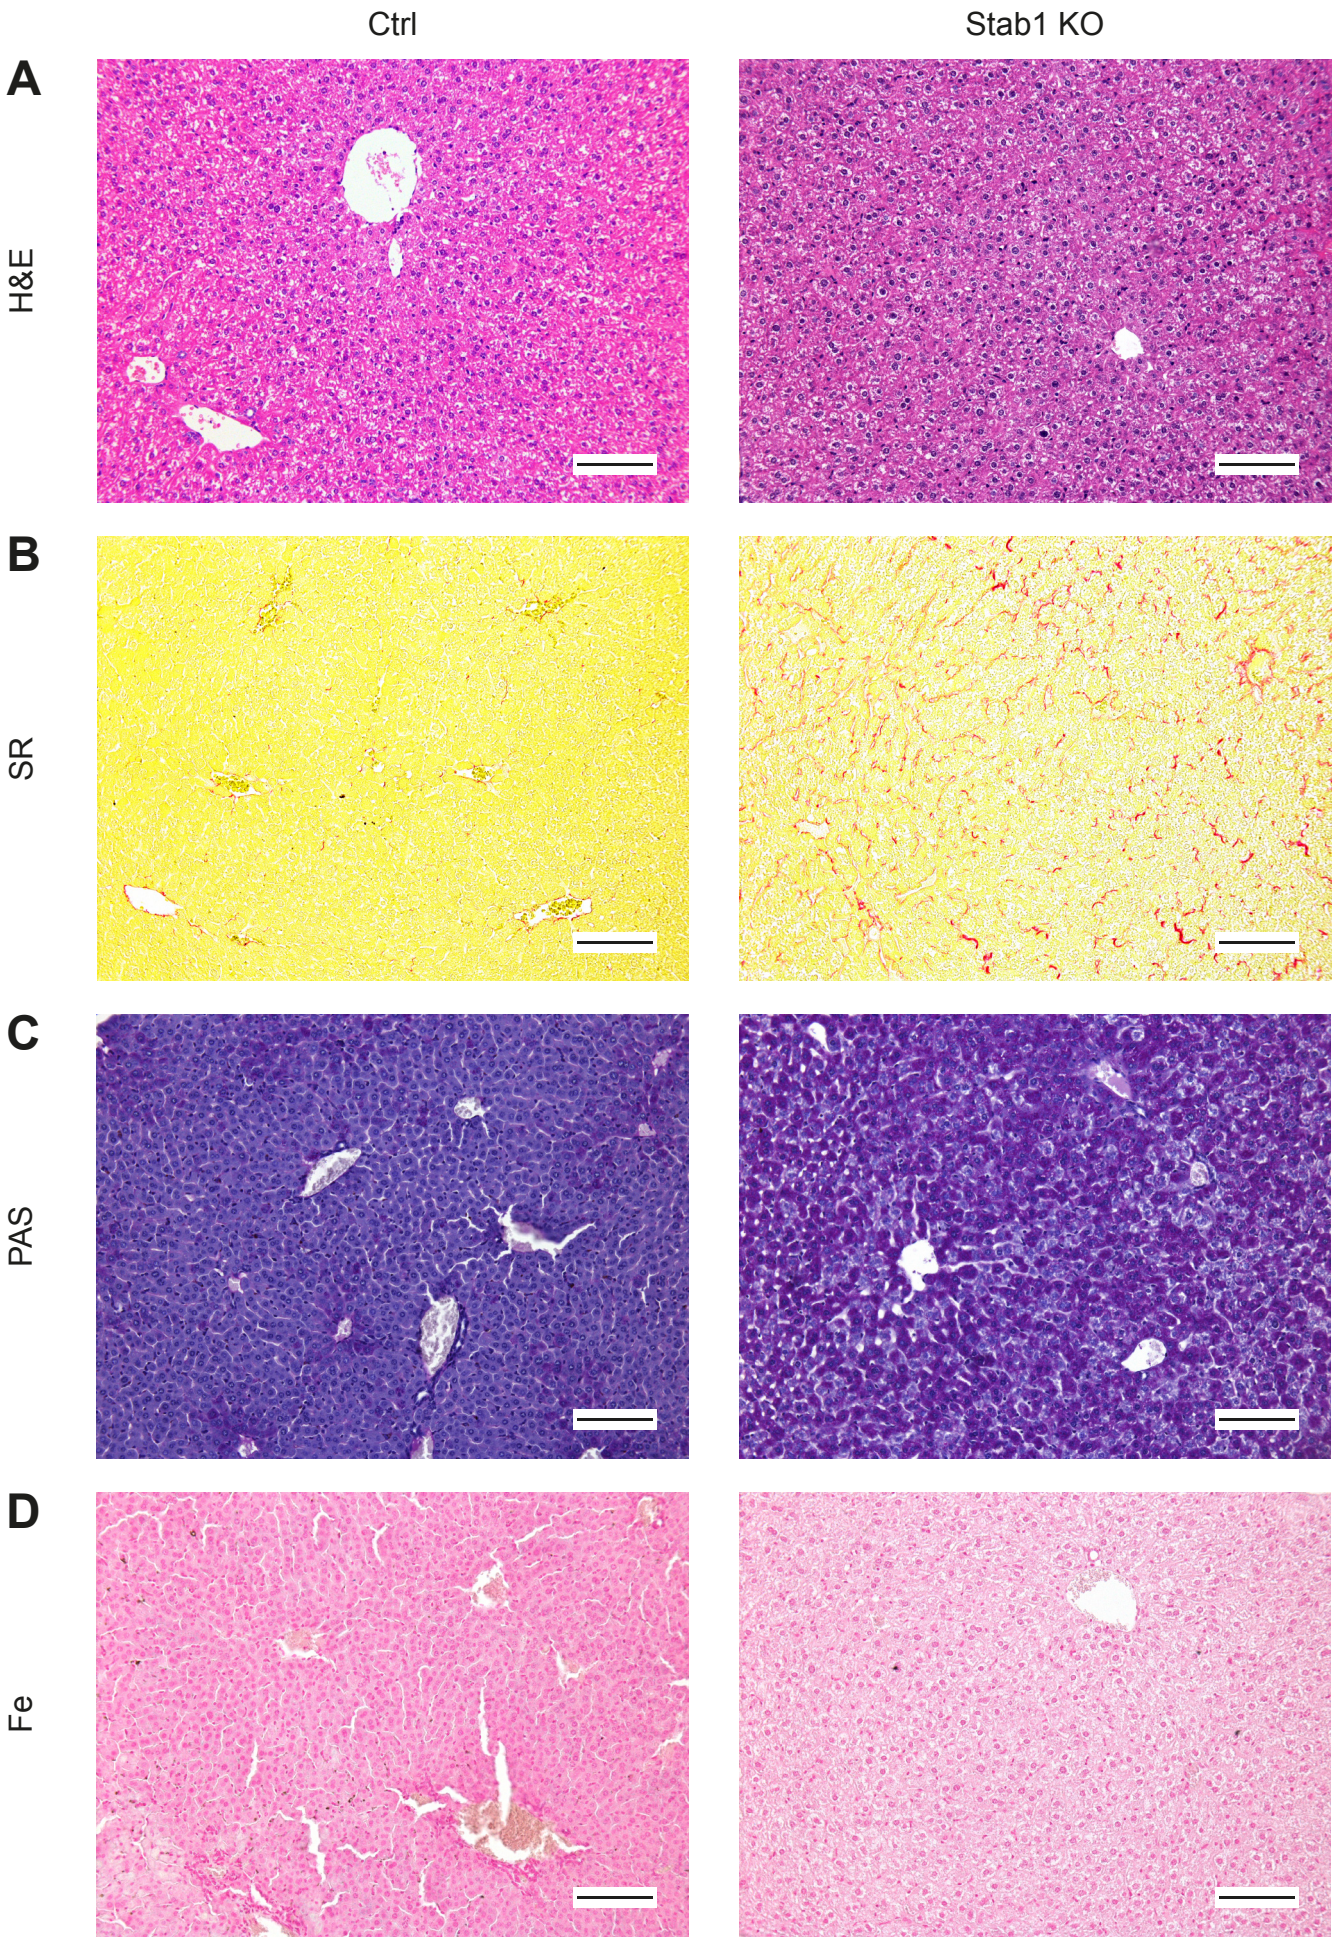

**Figure S3**

**Livers of mice injected with B16F10 *luc2* i.s.**

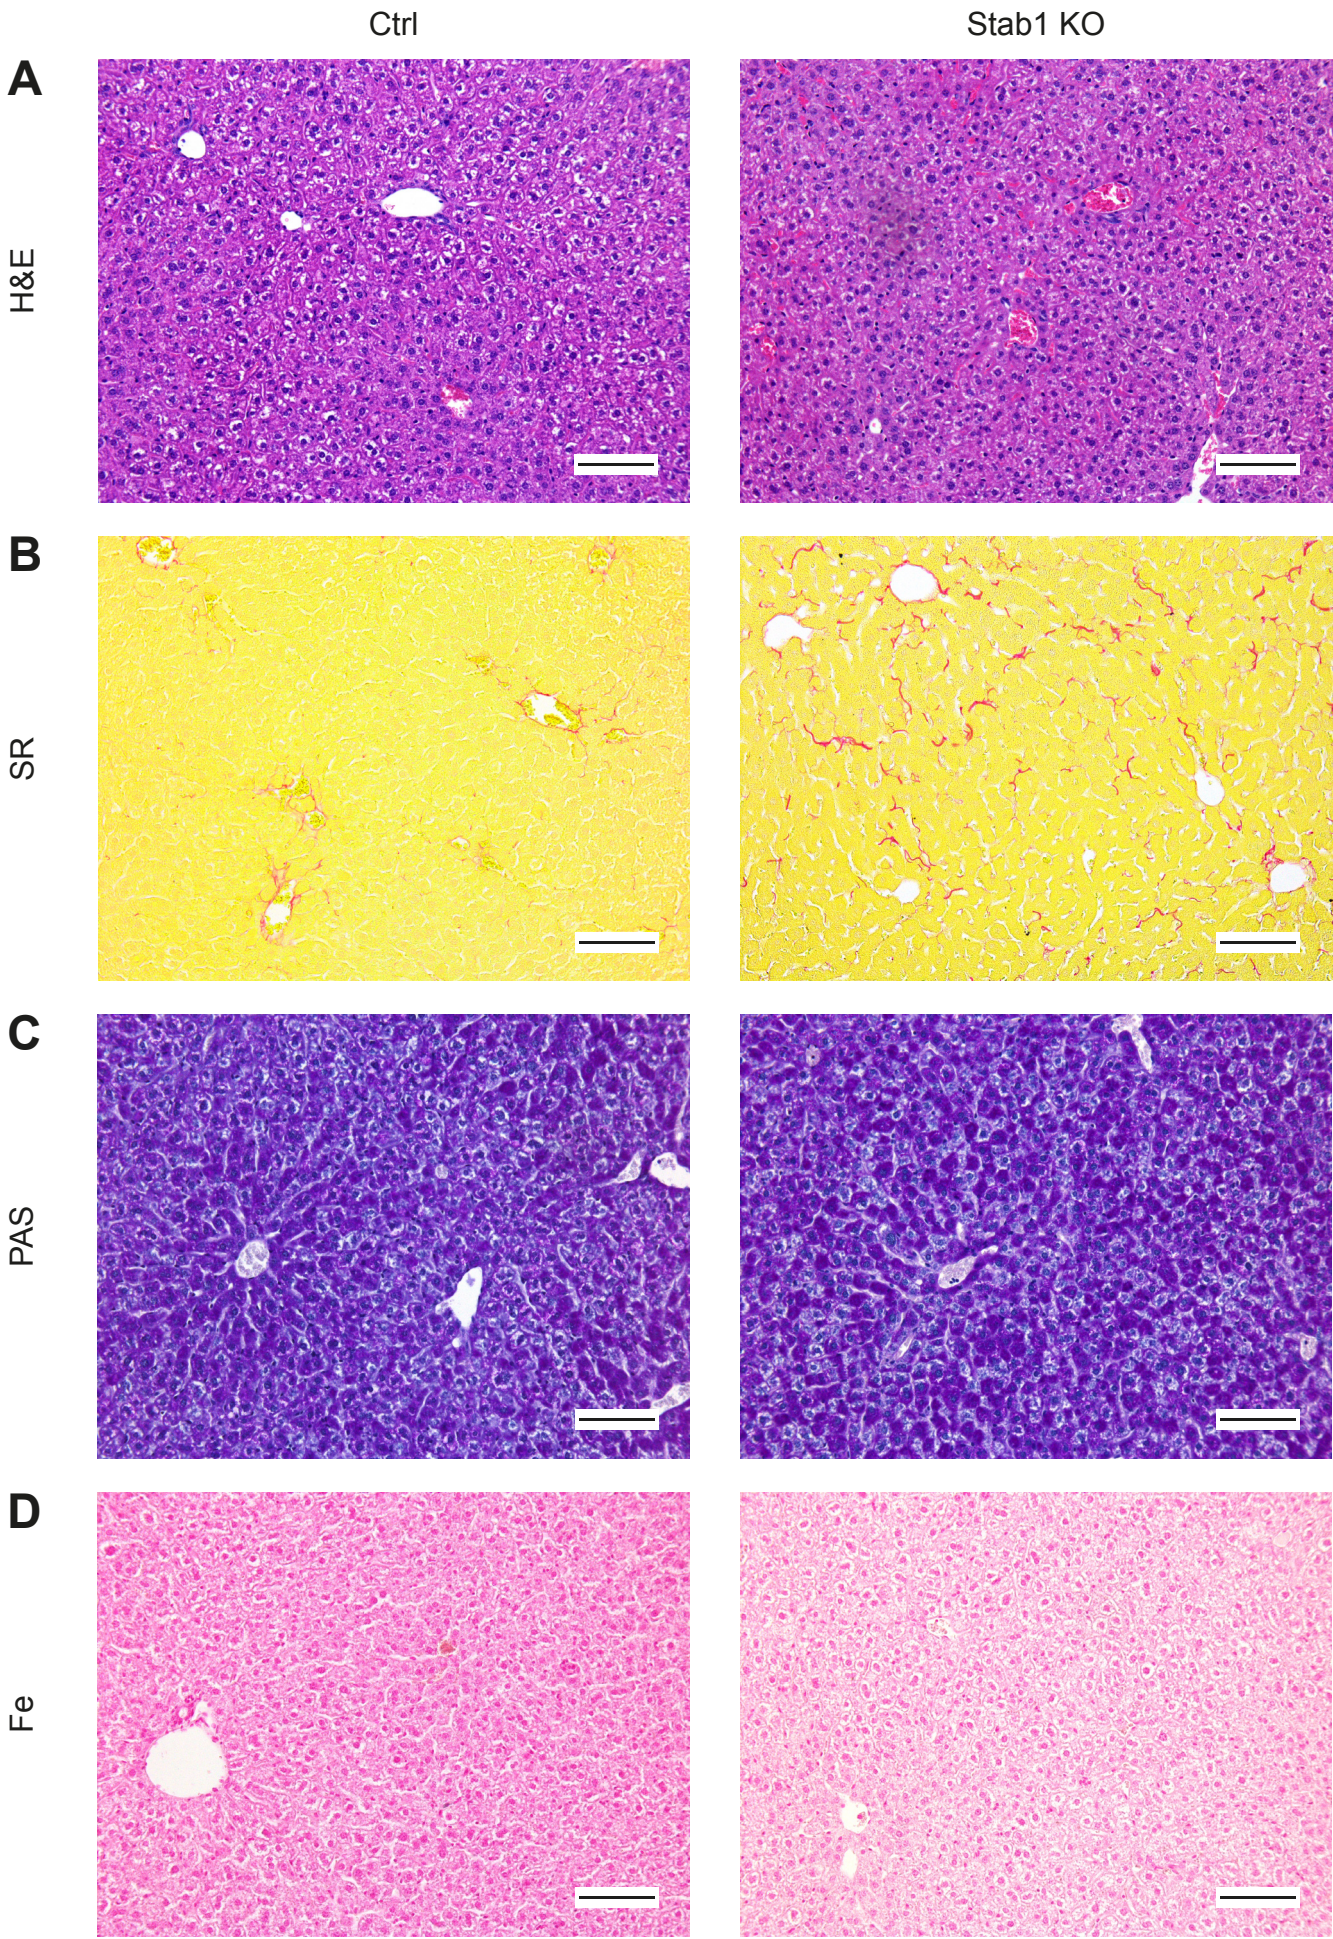

Figure S4

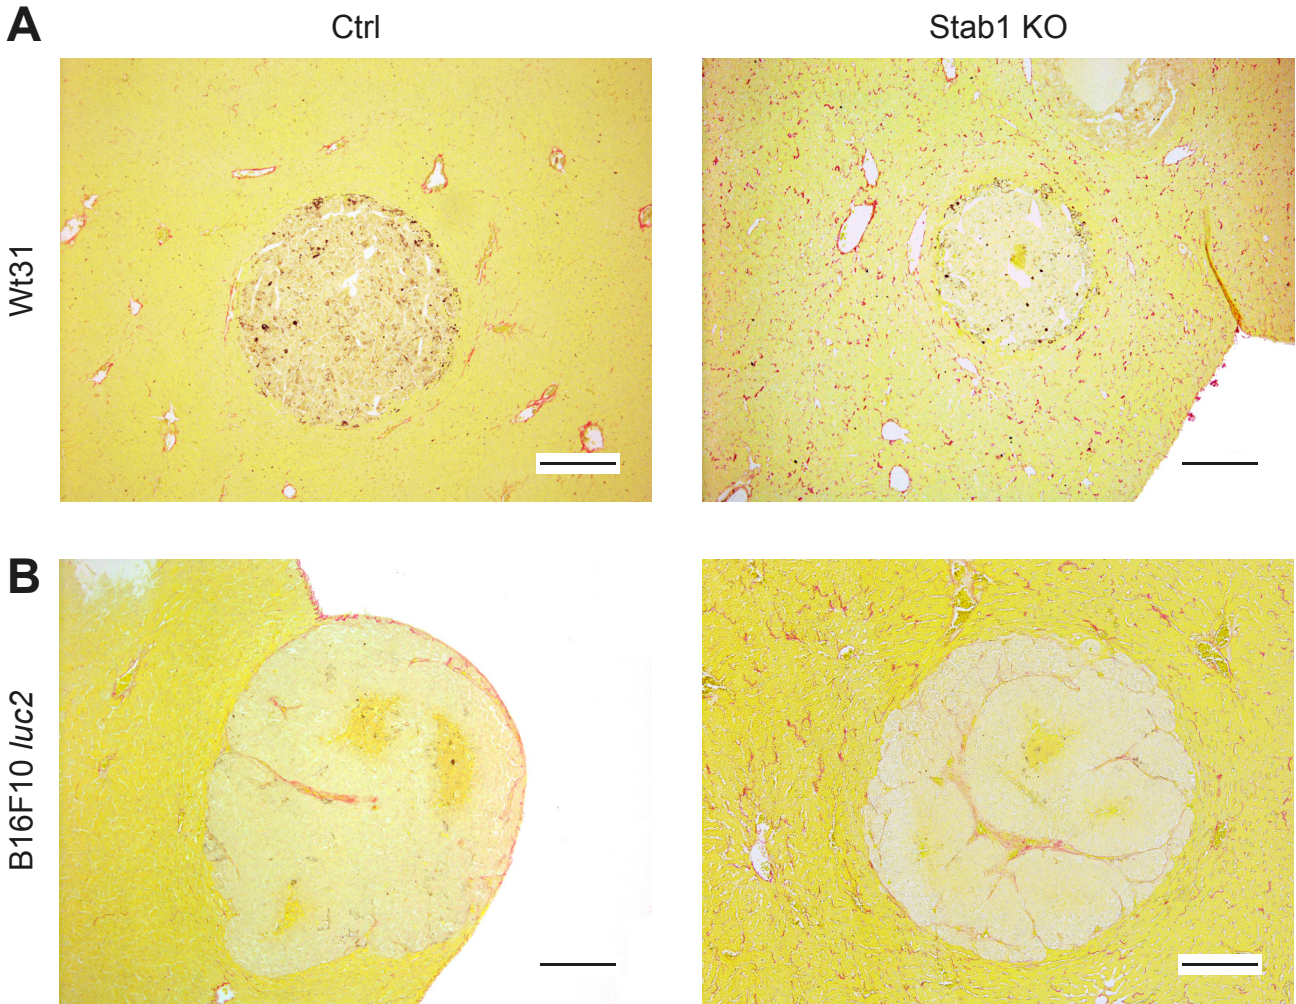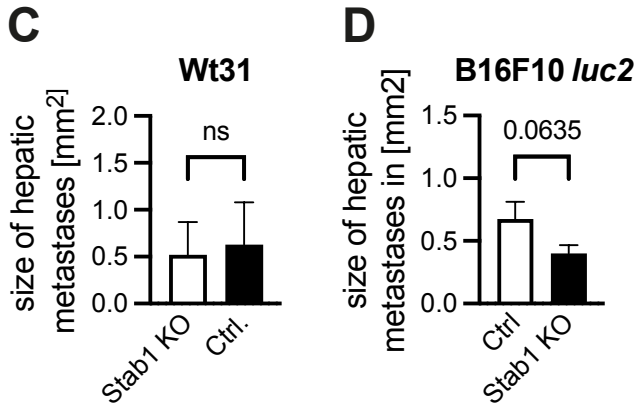

Figure S5

A

Wt31

Ctrl

Stab1 KO

DESMIN LAMA4

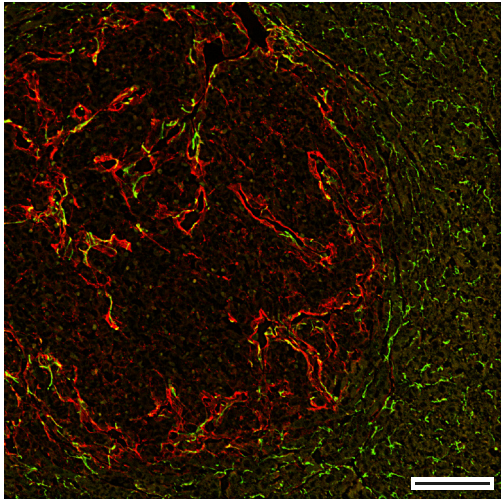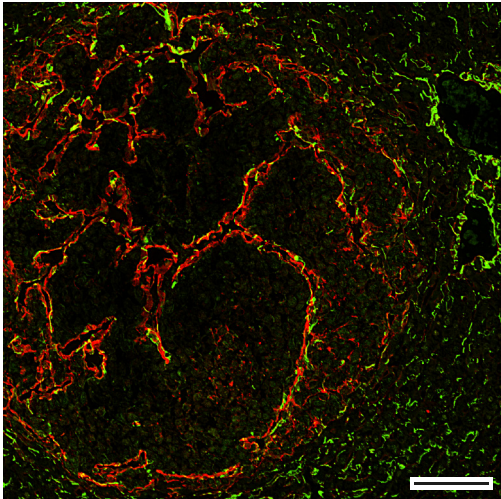

B

B16F10 /uc2

DESMIN LAMA4

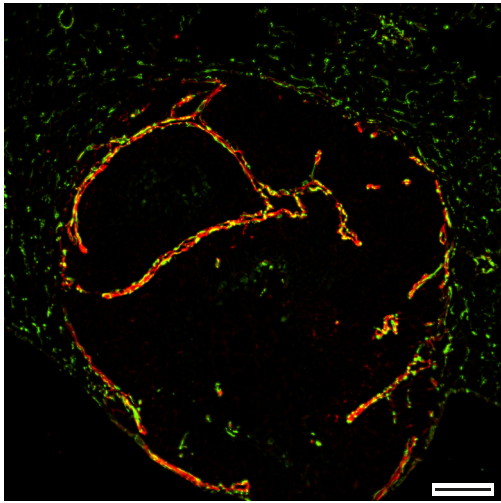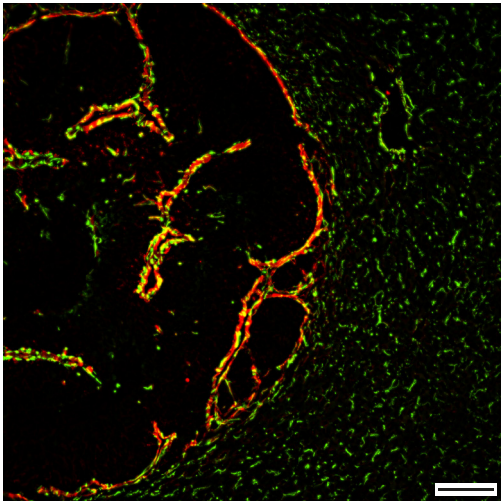

Figure S6

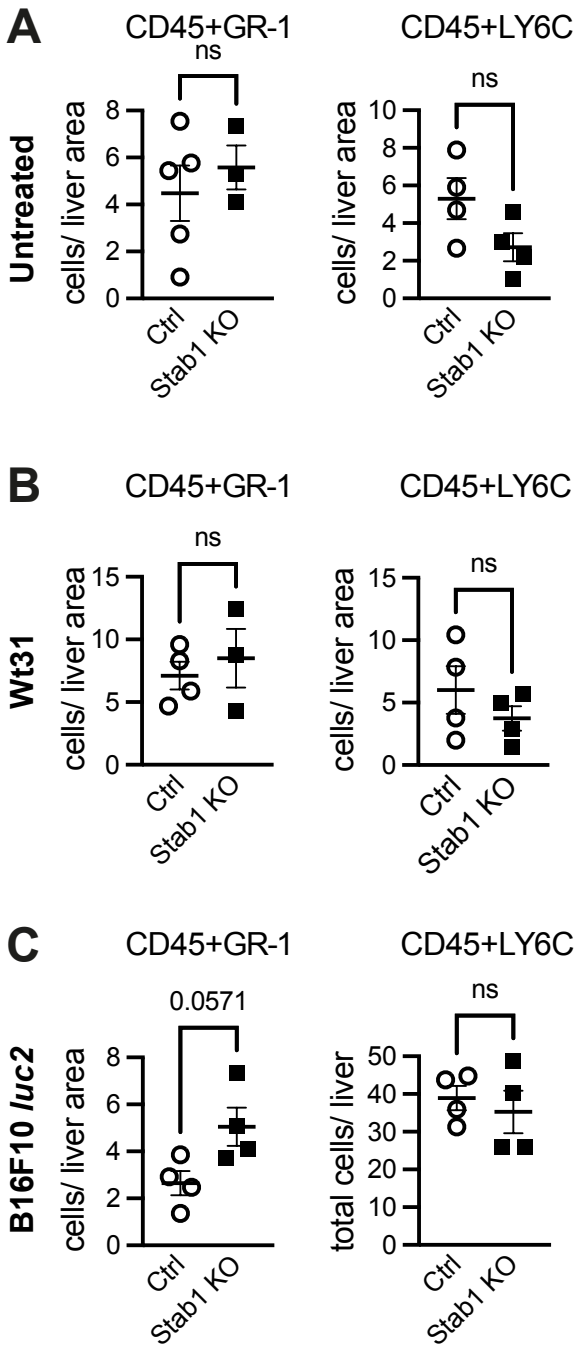

Figure S7

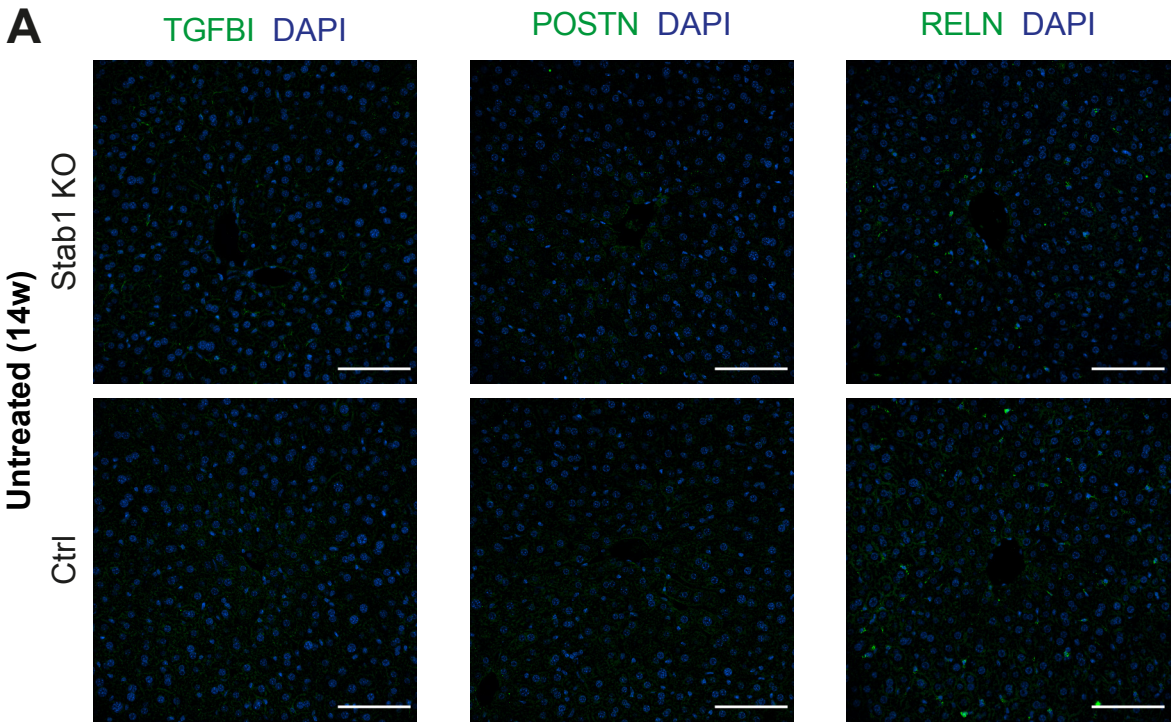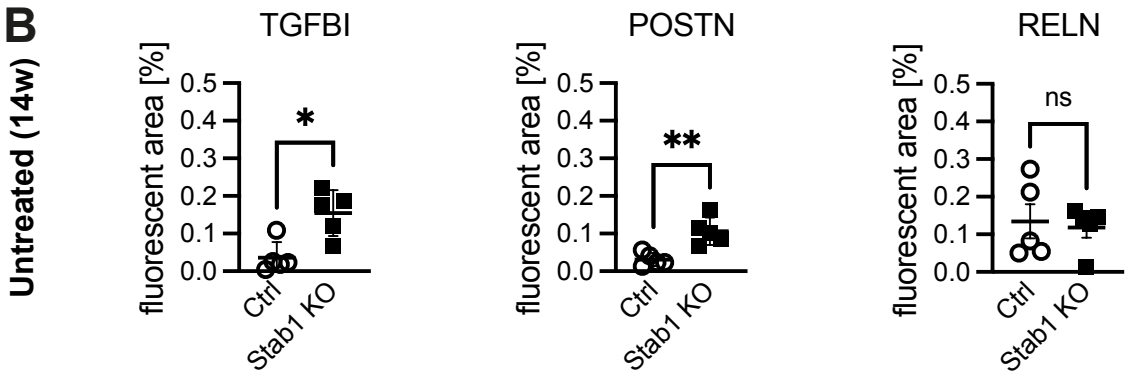

Figure S8

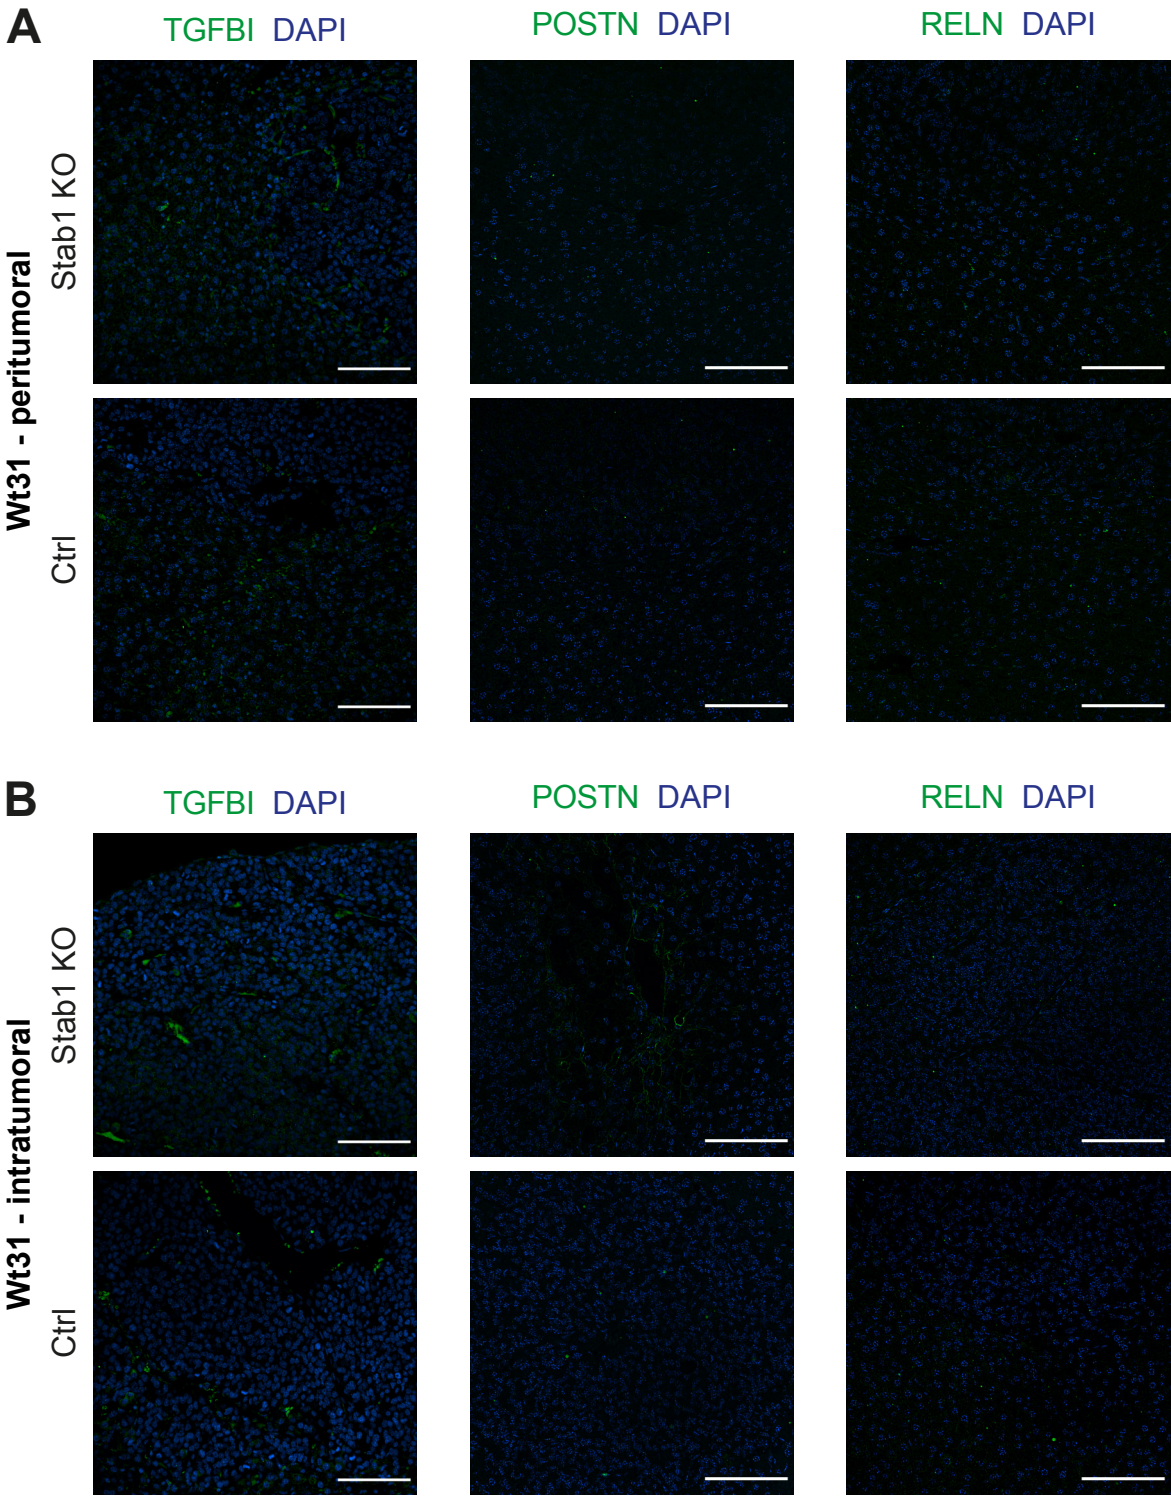

Figure S9

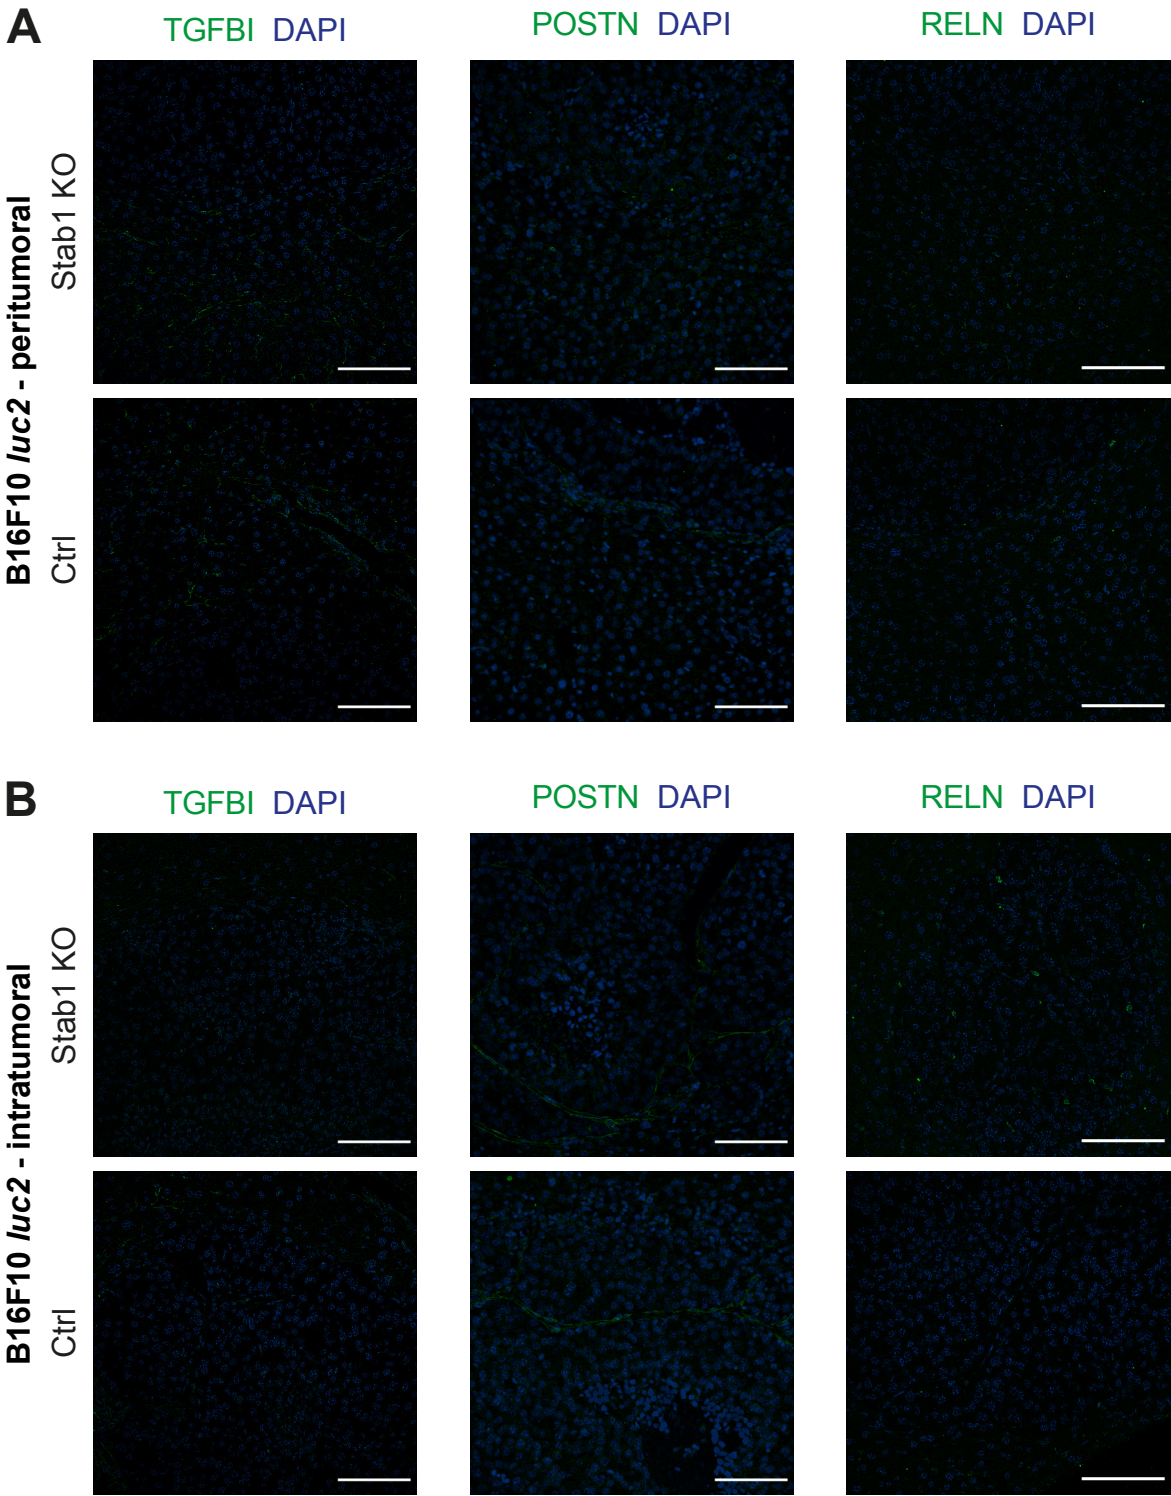

Supplement: s1 [file s1]
